# Supplementary material for: Applicability of PolyActive™ Thin Film Composite Membranes for CO2 Separation from C2H4 Containing Multi-Component Gas Mixtures at Pressures up to 30 Bar
Source: MDPI journal article supplement (doi:10.3390/membranes8020027), 2018-06-05
Supplement: s1 [file s1]

# Supplementary Materials: Applicability of PolyActive™ Thin Film Composite Membranes for CO<sub>2</sub> Separation from C<sub>2</sub>H<sub>4</sub> containing Multi-component Gas Mixtures at Pressures up to 30 bar

Karina Schuldt, Jan Pohlmann, Sergey Shishatskiy and Torsten Brinkmann

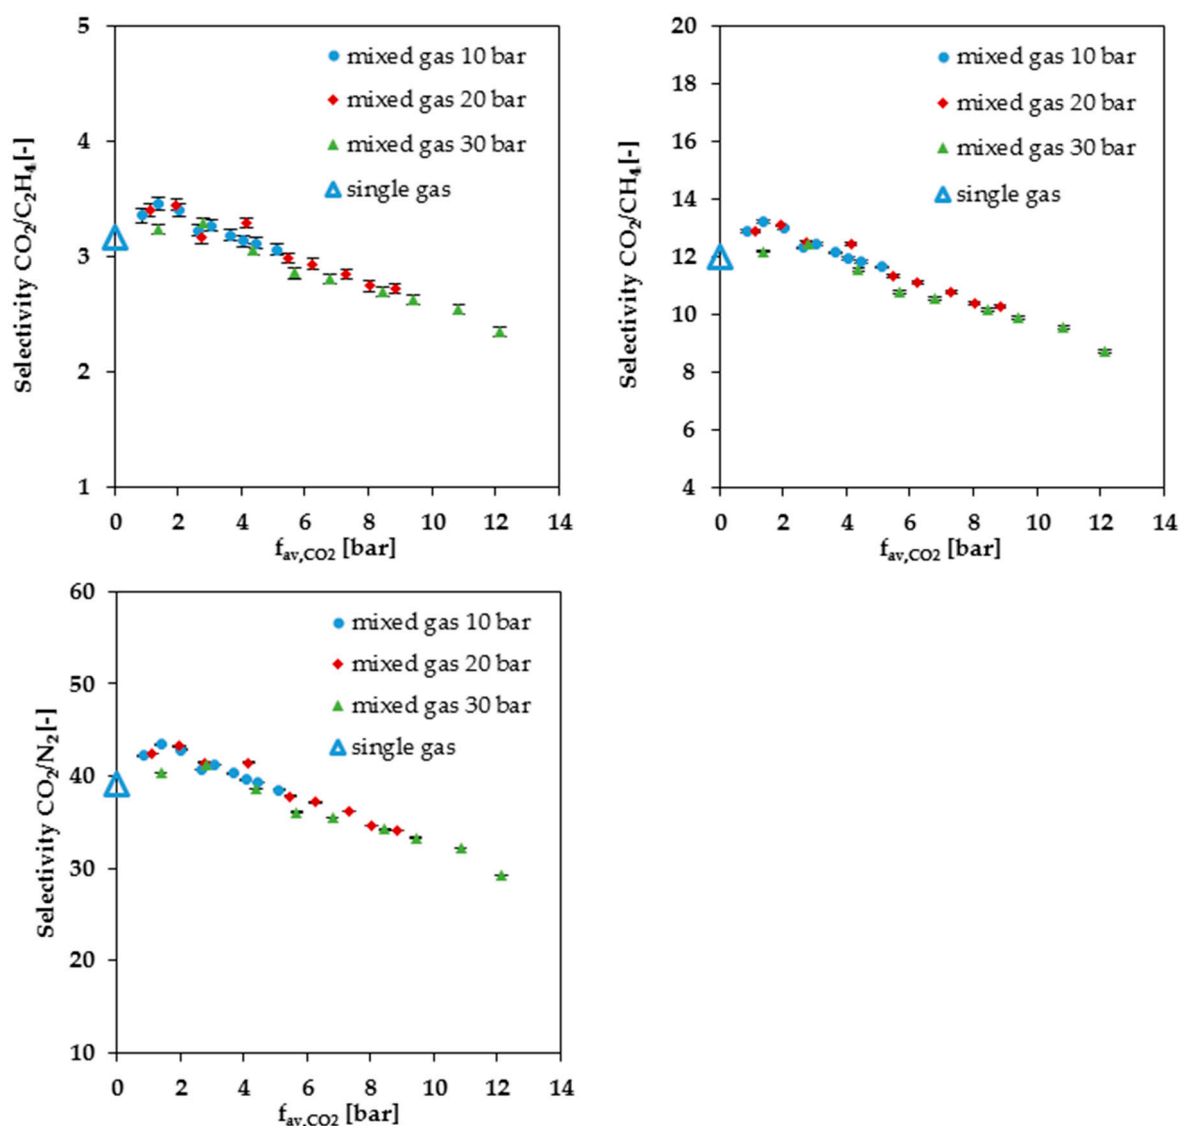

**Figure S1.** CO<sub>2</sub>/C<sub>2</sub>H<sub>4</sub>, CO<sub>2</sub>/CH<sub>4</sub> and CO<sub>2</sub>/N<sub>2</sub> selectivity at 25 °C plotted against average CO<sub>2</sub> fugacity from mixed gas experiments. The open triangle represents single gas data acquired at low pressure (0–2 bar), i.e. pressure increase data where the plotted value was determined using the  $L_0$  values of the Free-Volume model according to Equation (1). In this study, the selectivity is defined as the ratio of permeances.

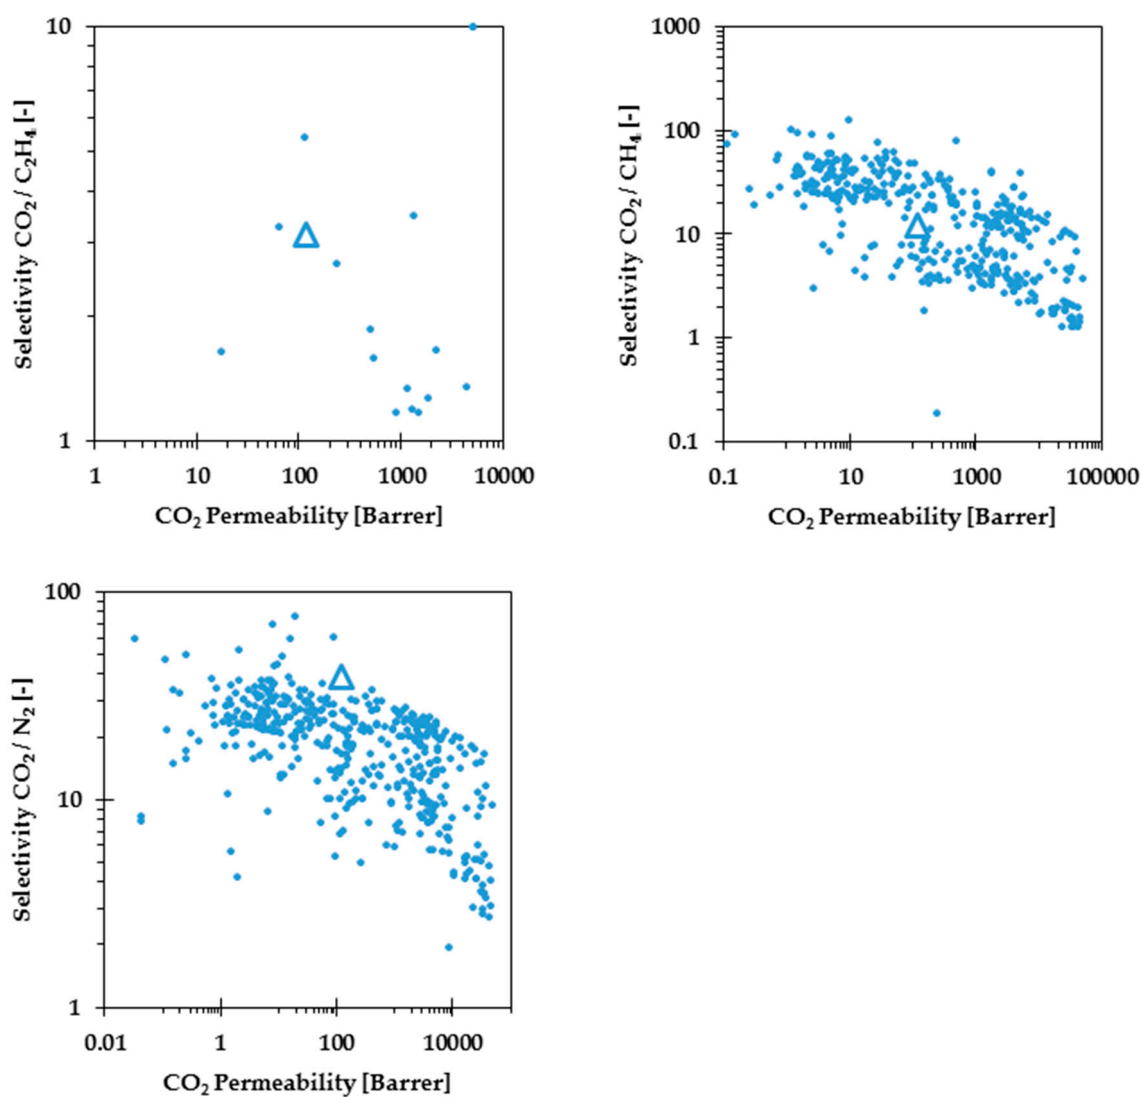

**Figure S2.** Position of the gas transport properties of PolyActive™ among those of polymers reported in the literature [1]. PolyActive™ is marked by open triangle.

## Reference

1. Polymer gas separation membranes. Available online: <https://membrane-australasia.org/polymer-gas-separation-membranes/> (Accessed on 29 May 2018)
